# Supplementary material for: Role of chemical composition and redox modification of poorly soluble nanomaterials on their ability to enhance allergic airway sensitisation in mice
Source: Part Fibre Toxicol. 2019 Oct 28;16:39. doi: 10.1186/s12989-019-0320-6 (PMC6819391; doi:10.1186/s12989-019-0320-6)
Supplement: Supplementary file 2 — Additional file 2. Cytokines in bronchoalveolar lavage fluid. [file 12989_2019_320_MOESM2_ESM.xlsx]

## Sheet: All cytokines
Mice #	Group	IFNy	IL-4	IL-5	IL-1b	IL-6	IL-13	IL-17	TNFa
1	PBS	9.47					43.26		10.03
2	PBS	17.73			4.27	12.04	79.64	0.61	8.4
3	PBS	18.35		6.46	4.27	0.92	40.15		10.83
4	PBS	13.66		6.46	7.82	13.22	47.03		13.52
5	PBS	15.41		6.46	7.82	9.43	50.69		11.07
6	PBS	3.76					17.76	2.04	11.37
	Mean	13.0633	#DIV/0!	6.46	6.045	8.9025	46.4217	1.325	10.87
	SEM	2.27342	#DIV/0!	0	1.0248	2.77614	8.15039	0.715	0.686066
7	OVA	23.5		6.46	7.82	12.04	40.15		9.79
8	OVA	11.85		6.46	4.27		49.23		8.93
9	OVA	9.96			4.27		35.31		12.26
10	OVA	21.56		8.13	4.27	26.6	50.69		11.37
11	OVA	4.08	0.45	13.56	13.12	6.24	20.87		11.37
12	OVA	14.97			7.82	4.19	49.23		13.25
79	OVA	20.37	0.45	6.46	4.27	12.04	28.44		9.95
80	OVA	8.98					36.95		8.49
	Mean	14.4088	0.45	8.214	6.54857	12.222	38.8588	#DIV/0!	10.6762
	SEM	2.43536	0	1.37507	1.26476	3.91848	3.7918	#DIV/0!	0.586104
13	TiO2	9.96	4.61	11.72	4.27	9.43	35.31		10.36
14	TiO2	5.83	2.07	20.29		9.43	17.76	1.3	10.6
15	TiO2	4.08	2.2	30.68		19.28	26.63	2.85	12.76
16	TiO2	4.08	3.58	13.56	4.27		21.87	4.3	14.2
17	TiO2	11.85	0.92	17.28	1.69	16.43	47.77	2.46	10.12
18	TiO2	17.31	4.07	75.81	1.69	54.15	56.34	4.3	12.83
	Mean	8.85167	2.90833	28.2233	2.98	21.744	34.28	3.042	11.8117
	SEM	2.13252	0.573128	9.90049	0.744782	8.32985	6.20517	0.573379	0.685023
19	CeO2NM212	17.1	1.72	9.49		9.43	23.81		8.03
20	CeO2NM212	38.69	0.62	20.29	4.27	21.89	74.71	1.69	10.12
21	CeO2NM212	10.44	0.62	14.39		6.24	13.26		9.95
22	CeO2NM212	10.68	0.45	9.49			24.77		9.79
23	CeO2NM212	23.89	8.01	30.68	15.37	33.47	31.09	1.81	12.69
24	CeO2NM212	6.92	0.35	11.72	1.69		14.43	1.81	11.07
	Mean	17.9533	1.96167	16.01	7.11	21.5967	30.345	1.77	10.275
	SEM	4.82033	1.22642	3.3644	4.19662	6.01134	9.28759	0.04	0.628998
25	Co3O4 (0%Fe2O3)	9.47	1.46	6.46	4.27	12.04	26.63	2.26	14.91
26	Co3O4 (0%Fe2O3)	8.22	1.05		4.27	20.17	29.33	0.99	16.23
27	Co3O4 (0%Fe2O3)	13.43	1.11	6.46	9.29	9.43	41.72		17.07
28	Co3O4 (0%Fe2O3)	15.41	0.45	6.46	1.69	21.89	41.72	1.93	11.29
29	Co3O4 (0%Fe2O3)	11.15	0.62				18.82		13.04
30	Co3O4 (0%Fe2O3)	9.47	0.24	4.09			18.82		11.22
	Mean	11.1917	0.821667	5.8675	4.88	15.8825	29.5067	1.72667	13.96
	SEM	1.11901	0.187961	0.5925	1.59082	3.03963	4.22314	0.380453	1.01997
31	Co3O4 (25%Fe2O3)	9.96	6.41		6.18	46.68	20.87	4.3	21.32
32	Co3O4 (25%Fe2O3)	14.1	3.28		7.82	21.04	28.44	0.99	14.98
33	Co3O4 (25%Fe2O3)	9.22	5.48	6.46	7.82	18.36	24.77	3.12	17.07
34	Co3O4 (25%Fe2O3)	9.96	6.3		7.82	18.36	20.87	4.73	21.68
35	Co3O4 (25%Fe2O3)	9.22	6.41		1.69	40.7	22.85	12.28	24.97
36	Co3O4 (25%Fe2O3)	14.97	1.62		9.29	18.36	26.63	0.61	15.49
	Mean	11.2383	4.91667	6.46	6.77	27.25	24.0717	4.33833	19.2517
	SEM	1.0572	0.821335	#DIV/0!	1.09259	5.27285	1.26634	1.73033	1.63331
37	Co3O4 (75%Fe2O3)	8.98	1.82		7.82	0.92	27.54	0.99	12.04
38	Co3O4 (75%Fe2O3)	7.71	0.78			6.24	18.82	1.57	9.79
39	Co3O4 (75%Fe2O3)	3.76	0.62				12.04		9.45
40	Co3O4 (75%Fe2O3)	11.38	1.92	6.46		0.92	33.65		9.11
41	Co3O4 (75%Fe2O3)	14.32	0.45		7.82	6.24	22.85		9.95
42	Co3O4 (75%Fe2O3)	12.3	3.24	6.46		12.04	34.48		12.55
	Mean	9.74167	1.47167	6.46	7.82	5.272	24.8967	1.28	10.4817
	SEM	1.53491	0.435771	0	0	2.06833	3.56771	0.29	0.58916
43	Co3O4 (0%Fe3O4)	6.38	4		4.27	40.7	28.44	2.04	15.23
44	Co3O4 (0%Fe3O4)	0.35	4.8			28.05	8.07		7.55
45	Co3O4 (0%Fe3O4)	6.38	8.21		10.64	54.15	20.87		12.19
46	Co3O4 (0%Fe3O4)	7.71	2.02		7.82	37.19	30.21		14.46
47	Co3O4 (0%Fe3O4)	9.71	5.72		4.27	59.24	16.68	0.99	13.52
48	Co3O4 (0%Fe3O4)	10.91	0.24	6.46		0.92	32.8		12.26
	Mean	6.90667	4.165	6.46	6.75	36.7083	22.845	1.515	12.535
	SEM	1.50638	1.14335	#DIV/0!	1.54321	8.53195	3.85079	0.525	1.11031
49	Co3O4 (25%Fe3O4)	12.76	0.92	6.46	4.27	9.43	6.58	2.26	10.99
50	Co3O4 (25%Fe3O4)	11.38	33.3	6.46		18.36	6.58	9.77	15.42
51	Co3O4 (25%Fe3O4)	12.76	2.38	6.46	1.69	21.89	22.85	0.61	11.37
52	Co3O4 (25%Fe3O4)	8.98	8.85	6.46	1.69	23.52	6.58	0.99	16.04
53	Co3O4 (25%Fe3O4)	14.1	22.1		10.64	18.36	77.19	2.46	12.69
54	Co3O4 (25%Fe3O4)	10.44	2.43		7.82	27.33	22.85	0.99	14.59
	Mean	11.7367	11.6633	6.46	5.222	19.815	23.7717	2.84667	13.5167
	SEM	0.754708	5.39085	0	1.76012	2.49393	11.1682	1.41802	0.872115
55	Co3O4 (75%Fe3O4)	9.96	4.48	9.49	4.27	14.34	38.57	2.56	14.72
56	Co3O4 (75%Fe3O4)	17.52	0.24	6.46		12.04	33.65		10.44
57	Co3O4 (75%Fe3O4)	16.89	1.51		4.27	9.43	33.65		11.82
58	Co3O4 (75%Fe3O4)	11.85	2.11				31.95	2.26	15.36
59	Co3O4 (75%Fe3O4)	5.55	1.82		4.27	12.04	22.85		12.19
60	Co3O4 (75%Fe3O4)	11.15	2.97	15.17		9.43	15.57		11.22
	Mean	12.1533	2.18833	10.3733	4.27	11.456	29.3733	2.41	12.625
	SEM	1.83258	0.584827	2.55286	0	0.927602	3.46835	0.15	0.80529
61	CeO2 (0%ZrO2)	14.76	16.97	13.56		9.43	36.95		10.28
62	CeO2 (0%ZrO2)	6.92	7.34	9.49			9.46		7.65
63	CeO2 (0%ZrO2)	14.97	10.96	16.61		0.92	12.04	0.61	10.75
64	CeO2 (0%ZrO2)	8.73	95.6	26.47		6.24	16.68	0.99	14.2
65	CeO2 (0%ZrO2)	14.76	0.92	6.46			19.86		8.58
66	CeO2 (0%ZrO2)	18.55	24.94	15.17		14.34	40.15		11.82
	Mean	13.115	26.1217	14.6267	#DIV/0!	7.7325	22.5233	0.8	10.5467
	SEM	1.78884	14.2947	2.82082	#DIV/0!	2.8163	5.29345	0.19	0.954623
67	CeO2 (25%ZrO2)	13.66	2.97	15.91	7.82	0.92	19.86		11.07
68	CeO2 (25%ZrO2)	7.18	3.93	24.29					11.22
69	CeO2 (25%ZrO2)	9.47	19.65	38.21	4.27	23.52	68.37	3.7	15.86
70	CeO2 (25%ZrO2)	10.68	2.29	58.82	4.27	0.92	12.04		14.33
71	CeO2 (25%ZrO2)	11.38	16.75	11.72			38.57		9.62
72	CeO2 (25%ZrO2)	12.76	3.86	17.93		12.04	22.85		10.12
	Mean	10.855	8.24167	27.8133	5.45333	9.35	32.338	3.7	12.0367
	SEM	0.952666	3.1809	7.25783	1.18333	5.40181	9.98718	#DIV/0!	1.01641
73	CeO2 (75%ZrO2)	5.26	24.08	11.72					10.6
74	CeO2 (75%ZrO2)	10.91	3.05	11.72			13.26		8.76
75	CeO2 (75%ZrO2)	19.37	34.22	41.68	4.27	18.36	56.34	2.04	12.19
76	CeO2 (75%ZrO2)	6.38	4.54	13.56		14.34	49.96		7.84
77	CeO2 (75%ZrO2)	16.68	26.87	13.56		0.92	44.78		9.28
78	CeO2 (75%ZrO2)	2.08	11.93	11.72					9.87
	Mean	10.1133	17.4483	17.3267	4.27	11.2067	41.085	2.04	9.75667
	SEM	2.7777	5.2231	4.88455	#DIV/0!	5.27263	9.5715	#DIV/0!	0.620197
